# Supplementary material for: Predicting Wolbachia invasion dynamics in Aedes aegypti populations using models of density-dependent demographic traits
Source: PubMed Central journal article supplement (PMC5100186; doi:10.1186/s12915-016-0319-5), 2016-11-08
Supplement: 12915_2016_319_MOESM1_ESM.pdf [file 12915_2016_319_MOESM1_ESM.pdf]

## Predicting Wolbachia invasion dynamics in *Aedes aegypti* populations using models of density-dependent demographic traits

Penelope A. Hancock, Vanessa L. White, Scott A. Ritchie, Ary A. Hoffmann, H. Charles J. Godfray

*BMC Biology* 2016

**Additional file 1: Table S1.1.** Definitions and values of model parameters.

| Symbol                                                              | Definition                                                                                                            | Value                                                                                                                                          |                                             | Source                      |
|---------------------------------------------------------------------|-----------------------------------------------------------------------------------------------------------------------|------------------------------------------------------------------------------------------------------------------------------------------------|---------------------------------------------|-----------------------------|
| $T_P$                                                               | Duration of the pupal stage                                                                                           | 2 days                                                                                                                                         |                                             | This study                  |
| $T_G$                                                               | Minimum time for females to become gravid following emergence                                                         | 4 days                                                                                                                                         |                                             | This study                  |
| $T_H$                                                               | Time between oviposition and hatching of eggs                                                                         | 6 days                                                                                                                                         |                                             | This study                  |
| $\omega$                                                            | The proportion of uninfected offspring produced by <i>Wolbachia</i> -infected females                                 | 0.01                                                                                                                                           |                                             | (Walker <i>et al.</i> 2011) |
| $sh$                                                                | The proportion of unviable offspring from an incompatible mating                                                      | 0.99                                                                                                                                           |                                             | (Walker <i>et al.</i> 2011) |
| $(\alpha_U, \beta_U, \gamma_U);$<br>$(\alpha_W, \beta_W, \gamma_W)$ | Parameters of functions describing mean larval development time                                                       | <i>Semi-field cage population</i>                                                                                                              | <i>Field release simulations</i>            | This study                  |
|                                                                     |                                                                                                                       | (0.68, 0.16, 0.68) <sup>a</sup> ;<br>(2.2, 0.013, 0.98) <sup>a</sup> ;<br>(1.8, 0.54, 0.53) <sup>b</sup> ;<br>(4.5, 0.22, 0.64) <sup>b</sup> ; | (1.8, 0.54, 0.53);<br>(1.8, 0.54, 0.53);    |                             |
| $(\nu_U, \eta_U, \psi_U);$<br>$(\nu_W, \eta_W, \psi_W)$             | Parameters of functions describing the standard deviation of larval development time                                  | (8.3, 0.81, 0.33) <sup>a</sup> ;<br>(4.1, 1.7, 0.27) <sup>a</sup> ;<br>(0.22, 0.017, 0.87) <sup>b</sup> ;<br>(4.8, 0.029, 0.80) <sup>b</sup> ; | (0.22, 0.017, 0.87);<br>(0.22, 0.017, 0.87) | This study                  |
|                                                                     |                                                                                                                       |                                                                                                                                                |                                             |                             |
| $a_U, b_U;$<br>$a_W, b_W$                                           | Parameters of functions describing per-capita female fecundity                                                        | (29.5, -3.36) <sup>a</sup> ;<br>(28.5, -3.25) <sup>b</sup> ;<br>(29.1, -3.35) <sup>b</sup> ;                                                   | (28.5, -3.25);<br>(28.5, -3.25);            | This study                  |
| $\mu_L^c$                                                           | Daily larval mortality                                                                                                | 0.25-0.01                                                                                                                                      | 0.05                                        | This study                  |
| $\mu_A^c$                                                           | Daily pupal and adult mortality                                                                                       | 0.03                                                                                                                                           | 0.03                                        | (Walker <i>et al.</i> 2011) |
| $\lambda_{\min}, \mu_{\max},$<br>$\sigma_{\max}$                    | Lower limit on per-capita female fecundity, and upper limits on larval development time means and standard deviations | 0.5, 60 days, 40 days                                                                                                                          | 0.5, 60 days, 40 days                       | This study                  |

a,b Value corresponding to the MCMC iteration with the highest posterior probability when observations from Population A (a) and Population B (b) are used to inform the Bayesian MCMC model (see text)
