# Supplementary material for: Predicting Wolbachia invasion dynamics in Aedes aegypti populations using models of density-dependent demographic traits
Source: PubMed Central journal article supplement (PMC5100186; doi:10.1186/s12915-016-0319-5), 2016-11-08
Supplement: 12915_2016_319_MOESM8_ESM.pdf [file 12915_2016_319_MOESM8_ESM.pdf]

# Predicting *Wolbachia* invasion dynamics in *Aedes aegypti* populations using models of density-dependent demographic traits

Penelope A. Hancock, Vanessa L. White, Scott A. Ritchie, Ary A. Hoffmann, H. Charles J. Godfray

*BMC Biology* 2016

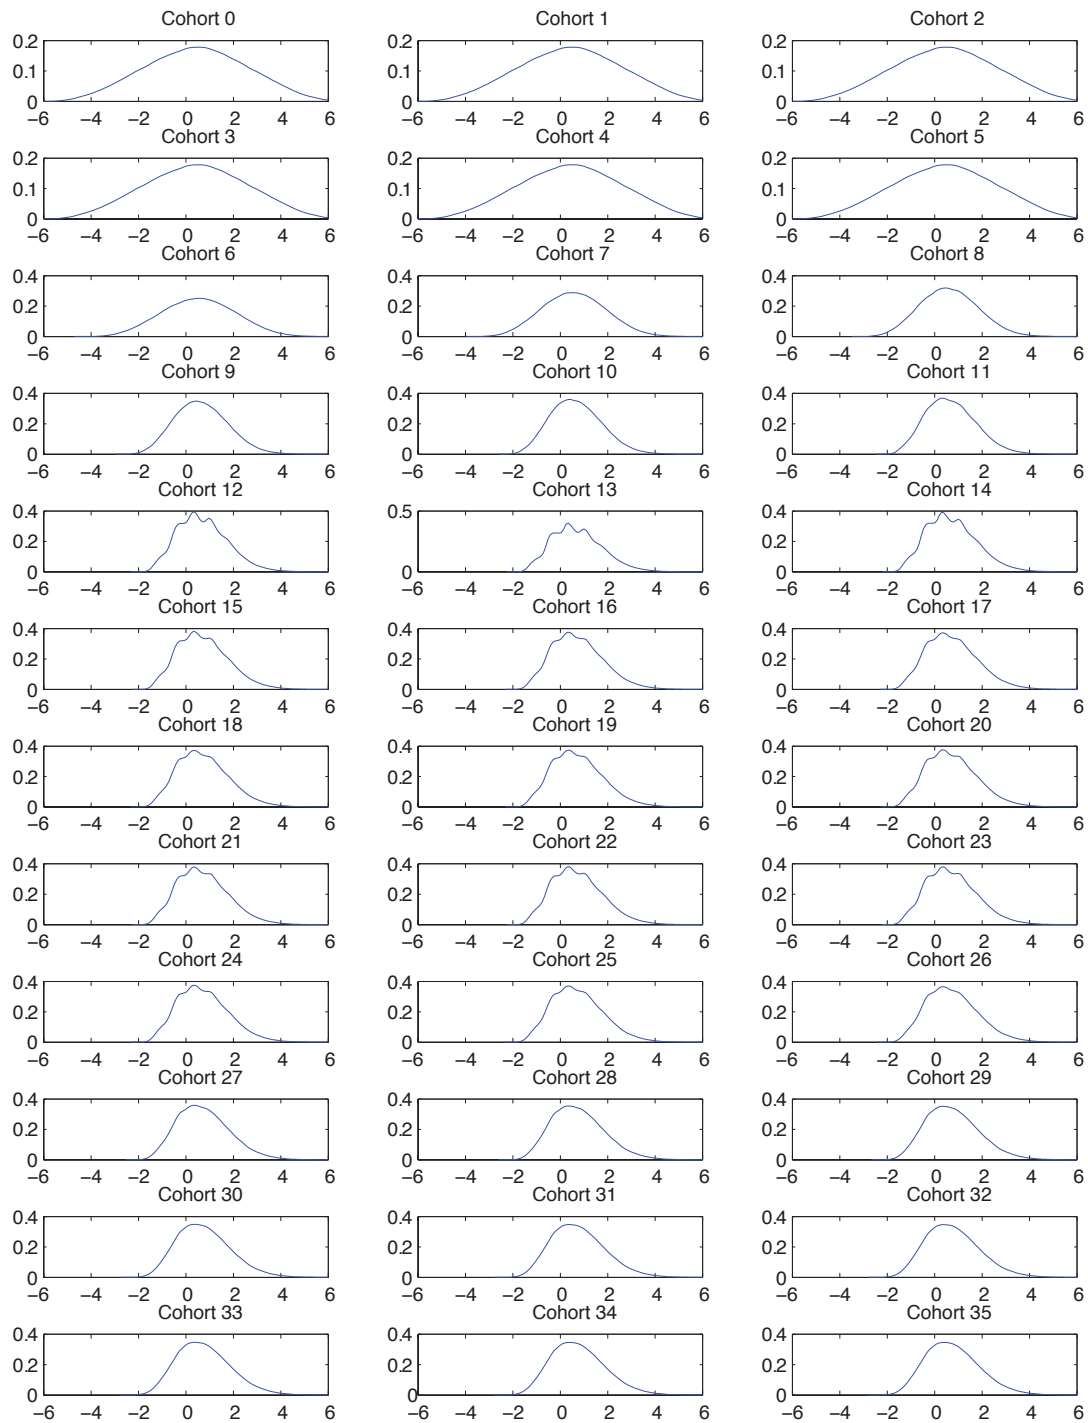

**Additional file 8: Figure S3.2.** Posterior distributions of the difference in the predicted per-capita fecundity of *Wolbachia*-infected and uninfected adult females ( $\lambda_{i,U} - \lambda_{i,W}$ ) for each cohort for Population B.
