# Supplementary material for: Predicting Wolbachia invasion dynamics in Aedes aegypti populations using models of density-dependent demographic traits
Source: PubMed Central journal article supplement (PMC5100186; doi:10.1186/s12915-016-0319-5), 2016-11-08
Supplement: 12915_2016_319_MOESM9_ESM.pdf [file 12915_2016_319_MOESM9_ESM.pdf]

## Predicting *Wolbachia* invasion dynamics in *Aedes aegypti* populations using models of density-dependent demographic traits

Penelope A. Hancock, Vanessa L. White, Scott A. Ritchie, Ary A. Hoffmann, H. Charles J. Godfray

*BMC Biology* 2016

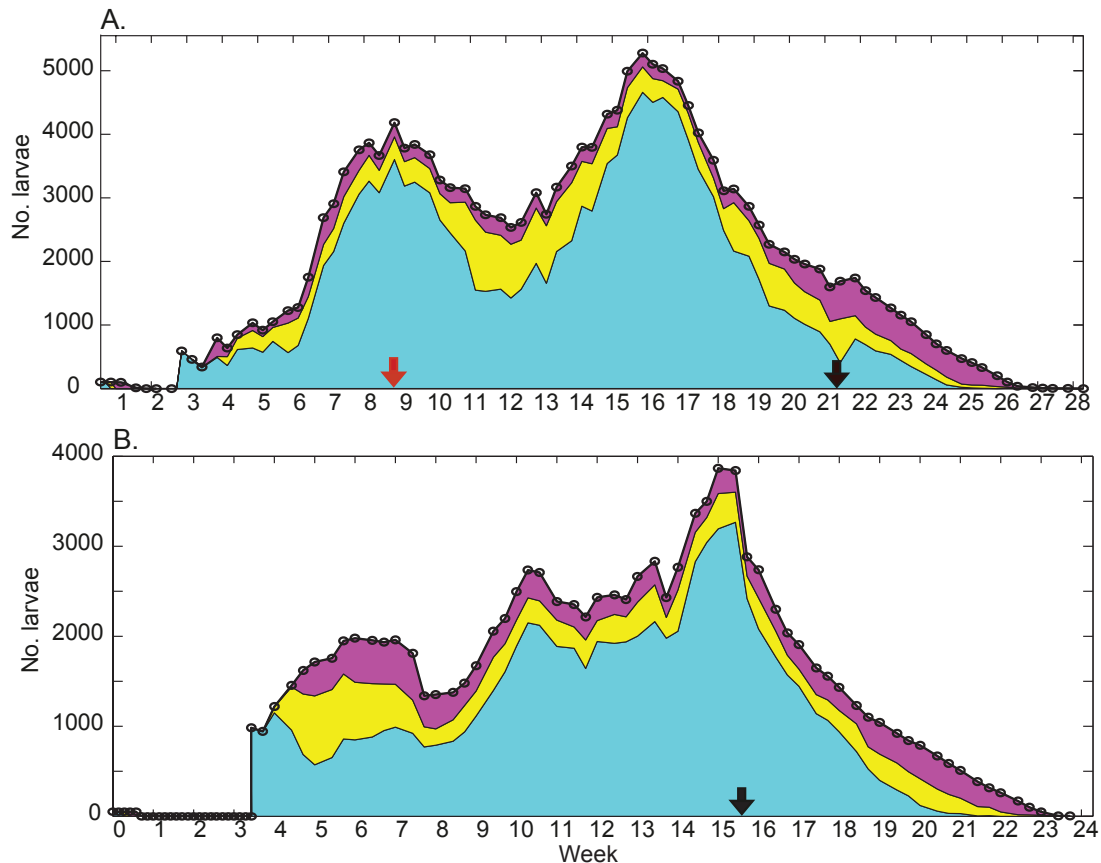

**Additional file 9: Figure S5.1.** Total number of larvae counted in each week (black line and circles), divided into first and second instars (blue shading), third instars (yellow shading) and fourth instars (pink shading). **A.** Population A; the red arrow indicates the day that introductions of *wMel*-infected pupae were initiated and the black arrow indicates the day that both *wMel* introductions and egg hatching were terminated (see (Hancock *et al.* 2016)). **B.** Population B; the black arrow indicates the day that egg hatching was terminated.
