# Supplementary material for: Predicting Wolbachia invasion dynamics in Aedes aegypti populations using models of density-dependent demographic traits
Source: PubMed Central journal article supplement (PMC5100186; doi:10.1186/s12915-016-0319-5), 2016-11-08
Supplement: 12915_2016_319_MOESM11_ESM.pdf [file 12915_2016_319_MOESM11_ESM.pdf]

# Predicting Wolbachia invasion dynamics in *Aedes aegypti* populations using models of density-dependent demographic traits

Penelope A. Hancock, Vanessa L. White, Scott A. Ritchie, Ary A. Hoffmann, H. Charles J. Godfray

*BMC Biology* 2016

## Population A

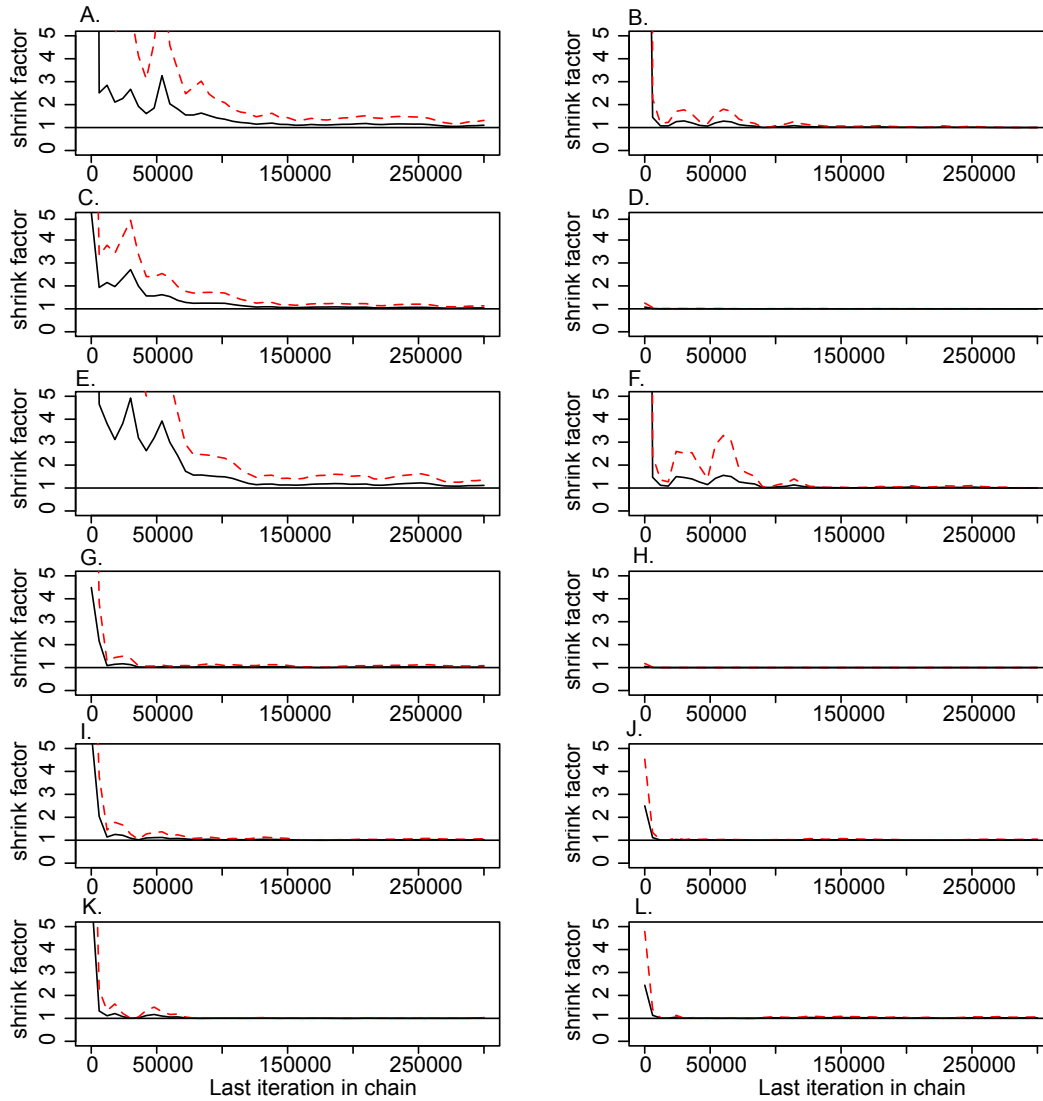

## Population B

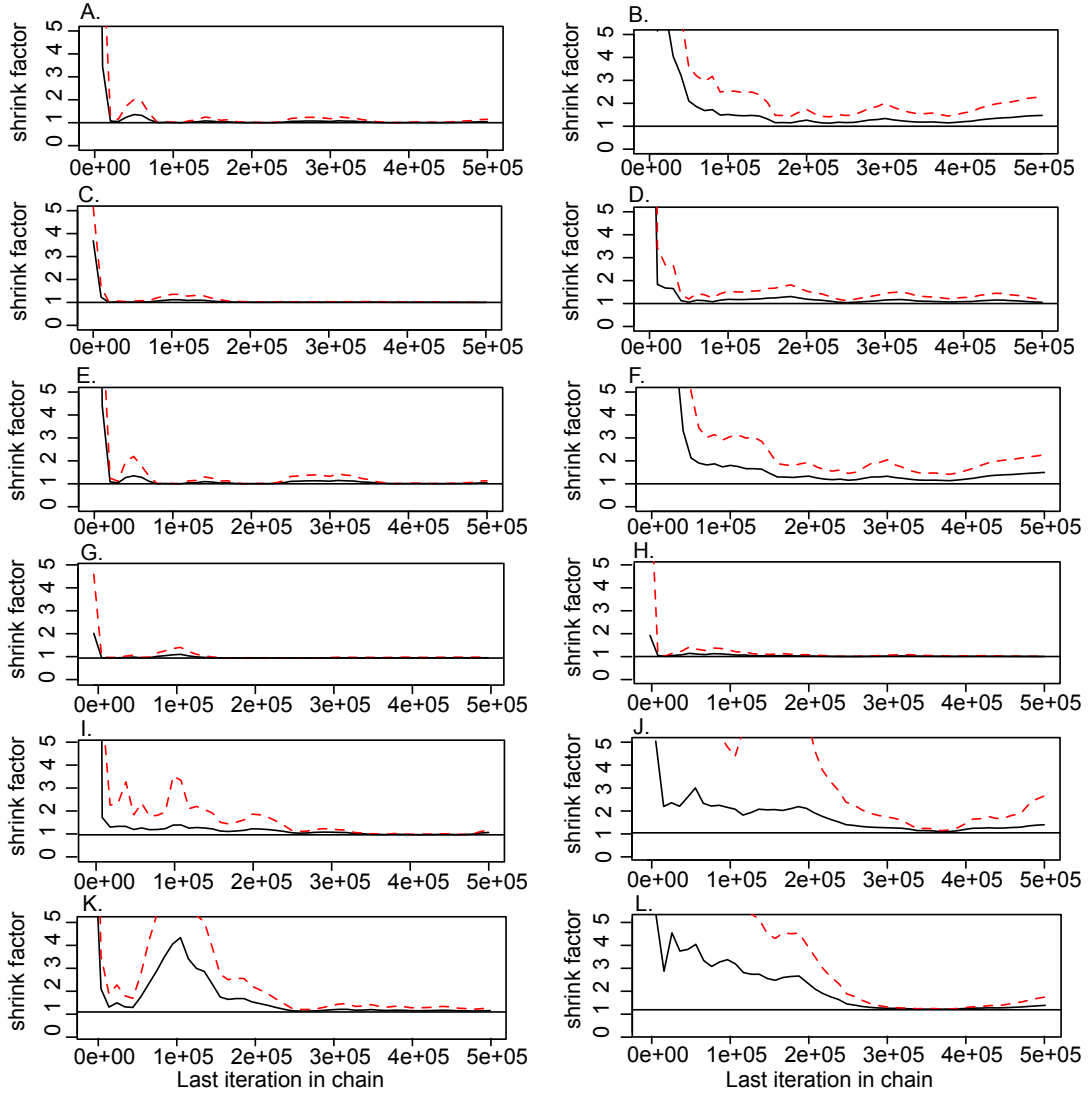

**Additional file 11: Figure S7.1.** Gelman-Rubin plots of the posterior fitted values. Plots show the shrink factor for three chains each starting at different initial values: A-B.  $\beta_U$  and  $\beta_W$ ; C-D.  $\alpha_U$  and  $\alpha_W$ ; E-F.  $\gamma_U$  and  $\gamma_W$ ; G-H.  $\nu_U$  and  $\nu_W$ ; I-J.  $\eta_U$  and  $\eta_W$ ; K-L.  $\psi_U$  and  $\psi_W$ .
