# Supplementary material for: Predicting Wolbachia invasion dynamics in Aedes aegypti populations using models of density-dependent demographic traits
Source: PubMed Central journal article supplement (PMC5100186; doi:10.1186/s12915-016-0319-5), 2016-11-08
Supplement: 12915_2016_319_MOESM12_ESM.pdf [file 12915_2016_319_MOESM12_ESM.pdf]

# Predicting Wolbachia invasion dynamics in *Aedes aegypti* populations using models of density-dependent demographic traits

Penelope A. Hancock, Vanessa L. White, Scott A. Ritchie, Ary A. Hoffmann, H. Charles J. Godfray

*BMC Biology* 2016

## Population A

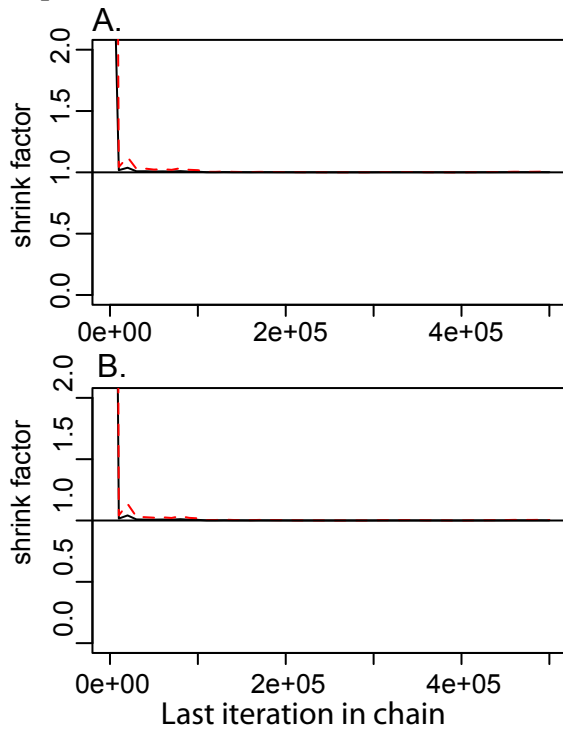

## Population B

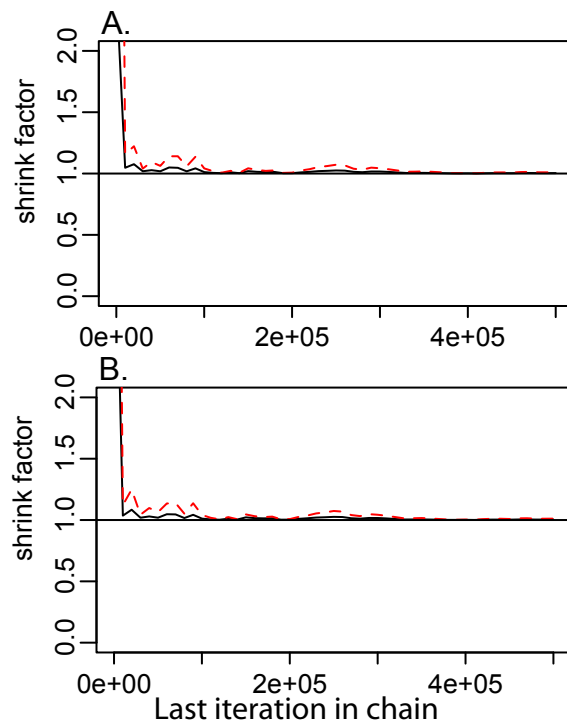

**Additional file 12: Figure S7.2.** Gelman-Rubin plots showing the shrink factor for three chains each starting at different initial values: A. *b*; B. *a*.
