# Supplementary material for: Predicting Wolbachia invasion dynamics in Aedes aegypti populations using models of density-dependent demographic traits
Source: PubMed Central journal article supplement (PMC5100186; doi:10.1186/s12915-016-0319-5), 2016-11-08
Supplement: 12915_2016_319_MOESM13_ESM.pdf [file 12915_2016_319_MOESM13_ESM.pdf]

# Predicting *Wolbachia* invasion dynamics in *Aedes aegypti* populations using models of density-dependent demographic traits

Penelope A. Hancock, Vanessa L. White, Scott A. Ritchie, Ary A. Hoffmann, H. Charles J. Godfray

*BMC Biology* 2016

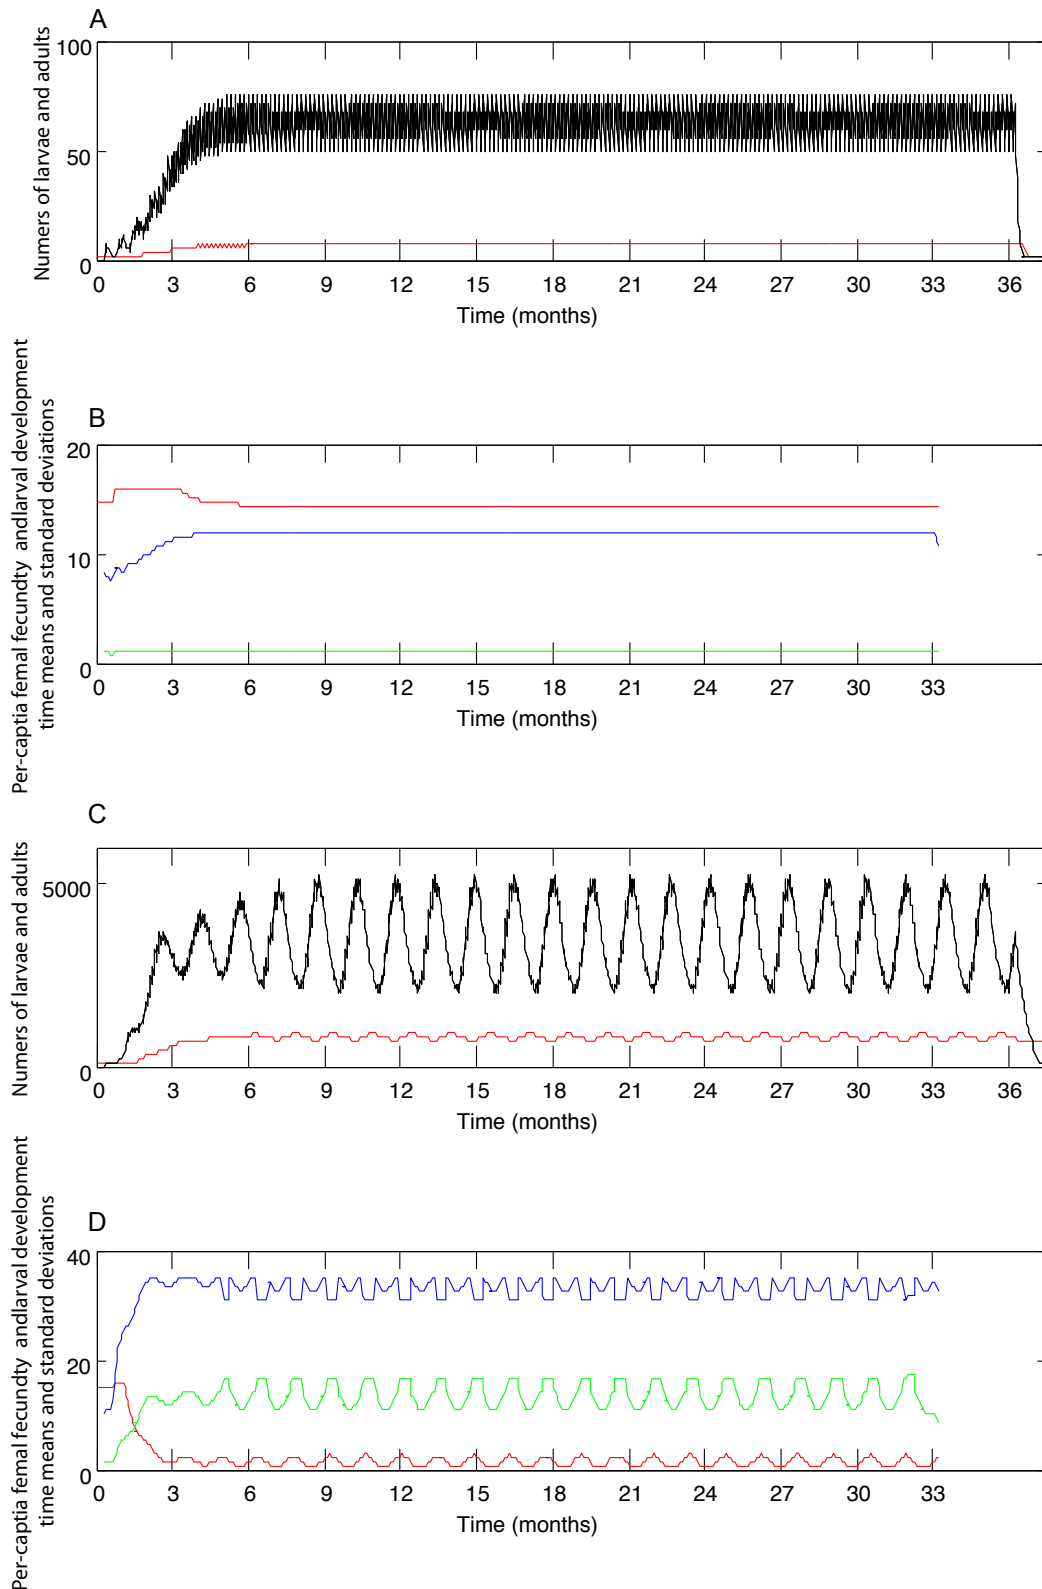

**Additional file 13: Figure S4.1.** Long term behaviour of the uninfected mosquito population in the absence of *Wolbachia*. A-B. The intensity of density-

dependent competition is low ( $C_L^*=0.018$ ,  $\mu_l=0.12$ ); C-D. The intensity of density-dependent competition is high ( $C_L^*=1.0$ ,  $\mu_l=0$ ). A,C. Numbers of larvae (black line) and adults (red line). B,D. Per-capita adult female fecundity (red lines), larval development time mean (blue line) and standard deviation (black line).
